# Supplementary material for: Tubular epithelial progenitors are excreted in urine during recovery from severe acute kidney injury and are able to expand and differentiate in vitro
Source: PeerJ. 2022 Oct 20;10:e14110. doi: 10.7717/peerj.14110 (PMC9588302; doi:10.7717/peerj.14110)
Supplement: Supplemental Information 5 — Raw data of urinary neprilysin, sCr, urinary expression of AQP1, AQP6, NPHS2 and SLC12A1 in urinary sediments during recovery from AKI of different etiologies (illustrated in Figure 1). Raw data of gene expression of AQP1, NPHS2, SLC12A1, and SLC12A3 of in vitro cultured cells (illustrated in Figure 4). Raw data of UMOD concentration measured by ELISA (illustrated in Figure S4). [file peerj-10-14110-s005.xlsx]

## Sheet: neprilysin+sCr ischemic AKI
days	serum Cr	neprilysin
1	7.11	12.28
2	9.43	7.38
3	6.55	5.651
4	10.72	7.178
5	10.8	2.596
6	10.88	2.637
7	11.56	2.878
8	13.57	2.137
9	9.76	1.87
10	11.44	0.161
12	13.42	0.151
13	11.3	0
14	8.07	0
16	9.64	0
18	8.58	0
20	6.3	0
22	5.11	0
24	4.24	0

## Sheet: neprilysin+sCr toxic AKI
days	serum Cr	neprilysin
1	2.73	NA
2	3.07	NA
3	4.35	4.791
5	5.42	5.714
6	7.55	3.46
8	9.67	1.042
9	6.18	1.724
10	7.94	0.275
11	9.43	0.202
13	8.55	0.156
14	9.87	0.208
16	9.33	0.184
18	7.55	0.162
20	6.24	0
24	3.73	0
37	1.19	0
64	0.91	0

## Sheet: neprilysin+sCr nephritic AKI
days	serum Cr	neprilysin
1	7.15	NA
2	9.34	NA
3	7.27	NA
5	8.31	5.759
6	9.97	1.941
7	11.91	1.913
9	10.4	3.627
10	9.5	3.3
12	9.55	4.956
15	8.45	2.354
19	5.08	2.034
25	2.06	0.202
35	1.48

## Sheet: neprilysin+sCr infectious AKI
days	serum Cr	neprilysin
1	12.39	85
2	14.2	83
3	10.49	76
4	9.22	58
5	11.62	29.999
8	10.56	5.2
9	9.82	4.837
10	11.04	1.926
11	10.02	2.939
12	8.69	1.446
13	6.47	2.377
17	6	3.957
18	4.6	NA
19	4.74	NA
20	5.54	NA
21	4.97	2.4
22	4.37	2.1
24	3.32	0.888
26	2.69	1.069
27	2	0
34	1.94	0

## Sheet: sediment-genes ischemic AKI
days	NPHS2	SLC12A1	AQP6	AQP1
1	1	1	1	1
2	0	0	0.688138	1.23203
3	0	0	0	4.06217
4	0.146686	0.15	0.245462	0.427798
5	0.0386574	0.04	0.0305685	0.28621
6	0.20305	0.2	0.514625	2.83632
7	0.0131544	0.01	0.0585814	0.751701
8	0.111655	0.11	0.0593645	2.9278
9	6.442e-05	0	0.0452202	0.428455
10	0.398423	0.4	0.0812425	6.0865

## Sheet: sediment-genes toxic AKI
days	NPHS2	SLC12A1	AQP6	AQP1
1	1	1	1	1
2	0.817164	0.35	0.671383	0.767759
3	1.48874	1.63	0.566713	1.357
4	3.41845	0.31	0.535398	1.6983
5	1.21388	1.57	6.36838	10.225
6	4.78895	0.19	0.77121	6.89185
7	3.01931	1.14	0.625603	14.3471
8	2.91529	4.16	1.93796	7.21397
9	0.0001956	0	0.0177277	0.0401181
10	1.20975	0.03	0.0318495	0.569906

## Sheet: sediment-genes nephritic AKI
days	NPHS2	AQP1	SLC12A1	AQP6
1	0	0	27.3626	0.165937
2	0	0	153.938	0.960983
3	0	0	245.361	0
5	0	0	2.44446	0.0394176
6	0	1	1	1
9	0	1.67	2.85433	0.0287391
13	0	0	0.277942	0.00476628
18	0	23.93	9.38547	0.104287
24	0	91.88	858.918	0.101151

## Sheet: sediment-genes infectious AKI
days	NPHS2	AQP1	SLC12A1	AQP6
1	0	0	0	32.7134
2	0	0	0	22.5113
3	0	0	0	0
5	0	0	2.57861	8.02989
6	0	1	1	1
9	0	16.07	27.4179	16.8351
13	0	0	0.176628	1.91639
18	0	34.91	13.6924	1.94201
24	0	10.61	99.1462	1.4793

## Sheet: in vitro expression (Figure 4)
Days	SLC12A3	AQP1	SLC12A1	NPHS2
7	1.384	0.071	1.37
8	1.638	2.13	3.54	3.74369
9	4.062	0.687	1.37	0.713835
10	1	1	1	1

## Sheet: UMOD - Supplementary Figure S4
		Control 1	Control 2	Control 3	Day 7	Day 8
UMOD ng/mL		30.88	30.9	32.38	0.58	3.19
	mean controls	31.3867
	SD controls	0.86031
